# Supplementary material for: A new class of cyclin dependent kinase in Chlamydomonas is required for coupling cell size to cell division
Source: eLife journal article supplement (doi:10.7554/elife.10767), 2016-03-25
Supplement: supp [file elife-10767-supp-v1.zip]

Archive with 11 entries (11 files):
- elife_poa_e10767_Figure_6_figure_supplement_1.pdf
- elife_poa_e10767_Figure_4_figure_supplement_1.pdf
- elife_poa_e10767_Supplementary_File_1.docx
- elife_poa_e10767_Figure_6_figure_supplement_2.pdf
- elife_poa_e10767_Figure_3_figure_supplement_1.pdf
- elife_poa_e10767_Supplementary_File_2.docx
- elife_poa_e10767_Figure_2_figure_supplement_1.pdf
- elife_poa_e10767_Figure_3_figure_supplement_2.pdf
- elife_poa_e10767_Figure_4_figure_supplement_2.pdf
- elife_poa_e10767_Figure_1_figure_supplement_1.pdf
- elife_poa_e10767_Figure_5_figure_supplement_1.pdf
