# Supplementary material for: A new class of cyclin dependent kinase in Chlamydomonas is required for coupling cell size to cell division
Source: eLife journal article supplement (doi:10.7554/elife.10767), 2016-03-25
Supplement: supp [file elife-10767-supp-v1.zip › elife_poa_e10767_Figure_2_figure_supplement_1.pdf]

Figure 2-figure supplement 1

|         |     |                                                                |
|---------|-----|----------------------------------------------------------------|
| crCDKG1 | 1   | MAPGFGNFATADDASTSSGYQDQGPLARLLSKLRQFKALAADKDLANSELAPLIRALPLD   |
| crCDKA1 | 1   | -----                                                          |
| hsCDK1  | 1   | -----                                                          |
| crCDKG1 | 61  | TELQQLLAKFWHPGHNFSTTVDLANLKGALOKYKYIKIGQLGSGSYGVVHKAINRETNE    |
| crCDKA1 | 1   | -----MDKYEKLERAGEGTYGVVFKARDRYTNE                              |
| hsCDK1  | 1   | -----MEDYTKIEKIGEGTYGVVYKGRHKTTGQ                              |
|         |     | <b>K125</b> <b>PSTAIRE helix</b>                               |
| crCDKG1 | 121 | LLAIKKV-VHSIENGLSDSTIREISTLRELOHDNIVRLKDIIATVNGTHVHLVLEFLDCD   |
| crCDKA1 | 29  | I VALKKIRLEQEDEGVPSTAIREISFLKELRHDNVRLYDVLVYSDR--RLYLVEFLDL    |
| hsCDK1  | 29  | VVAMKKIRLESEEEGVPSTAIREISLKLRLHPNIVSLQDVLQDS--RLYLIFEFLSMD     |
|         |     | <b>Catalytic loop</b>                                          |
| crCDKG1 | 180 | LRHYLDTYAEASNINR--IKSIVFOILRGIRHAHANSTIMHRDLKPQNVLVGVHSGNVKIT  |
| crCDKA1 | 87  | LKKQMDQTP-NFSRNQRVIKMYMWOMLSGIAFCHSRRILHRDLKPQNLLIDRSRNTLKL    |
| hsCDK1  | 87  | LKKYLD SIPPGQYMDSSLVKSILYQILOGIVFCHSRRVLHRDLKPQNLLID-DKGTIKLA  |
|         |     | <b>Activation loop</b> <b>T254</b>                             |
| crCDKG1 | 238 | DFGLARCF-LPNEDRAYTERVVTLVYRAPEILLGAQHYSYSAVDLWSVGCIMAEMVNFEP   |
| crCDKA1 | 146 | DFGLARAFGIP--VRAYTHEVVTLWYRAPEILLGSKTYSTPVDIWSIGCIFAEMVNRPL    |
| hsCDK1  | 146 | DFGLARAFGIP--IRVYTHEVVTLWYRSPEVLLGSARYSTPVDIWSIGTIFAEALATKKPL  |
| crCDKG1 | 297 | FRSDSEIGLLFRMFEO LGTPTPDAWHELSCGLAYYSENFPRFVPRRFEDMVPRLANDAVGL |
| crCDKA1 | 204 | FPGDSEIDQLHKIFQL LGTPDEAMWAGCSALPDFKDTFPKWRPQNLGAAPVTLSP--GV   |
| hsCDK1  | 204 | FHGDSEIDQLFRIFRALGTPNNEVWPEVESLODYKNTFPKWKPGSLASHVKNLDEN--GL   |
| crCDKG1 | 357 | DLLRRMLCYDPRORITASEALVHPWFNDVVV-----                           |
| crCDKA1 | 262 | DLLARMLVYTPQHRITASAMEHAYFNEIRDTMRAAVAPGGGGMGGGMGGMGAMGGMGGG    |
| hsCDK1  | 262 | DLLSKMLIYDPAKRISGKMALNHPYFNDLDNQIKKM-----                      |
| crCDKG1 |     | -----                                                          |
| crCDKA1 | 322 | MGVMR                                                          |
| hsCDK1  |     | -----                                                          |
