# Supplementary figures and images for: A new class of cyclin dependent kinase in Chlamydomonas is required for coupling cell size to cell division
Source: eLife journal article supplement (doi:10.7554/elife.10767), 2016-03-25

Figure 6-figure supplement 1

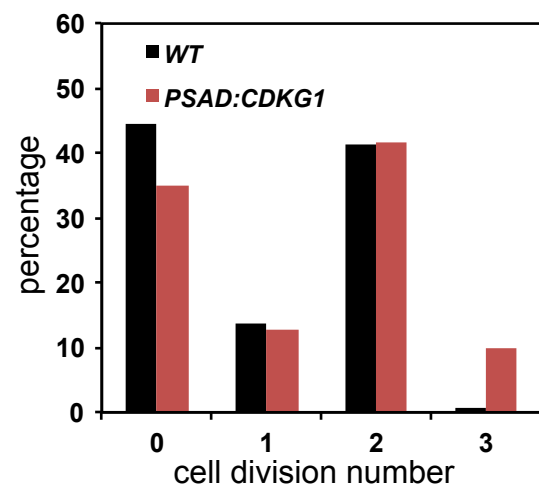

Supplement: supp [file elife-10767-supp-v1.zip › elife_poa_e10767_Figure_6_figure_supplement_1.pdf]

Figure 4-figure supplement 1

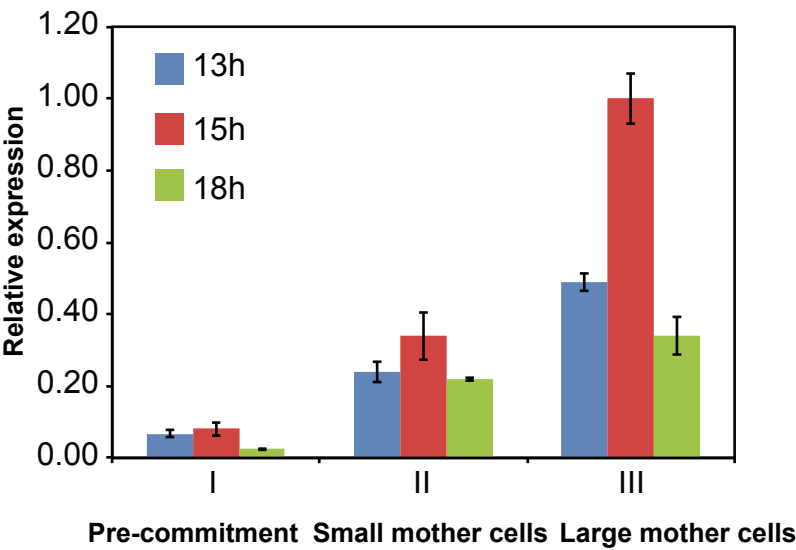

Supplement: supp [file elife-10767-supp-v1.zip › elife_poa_e10767_Figure_4_figure_supplement_1.pdf]

Figure 6-figure supplement 2

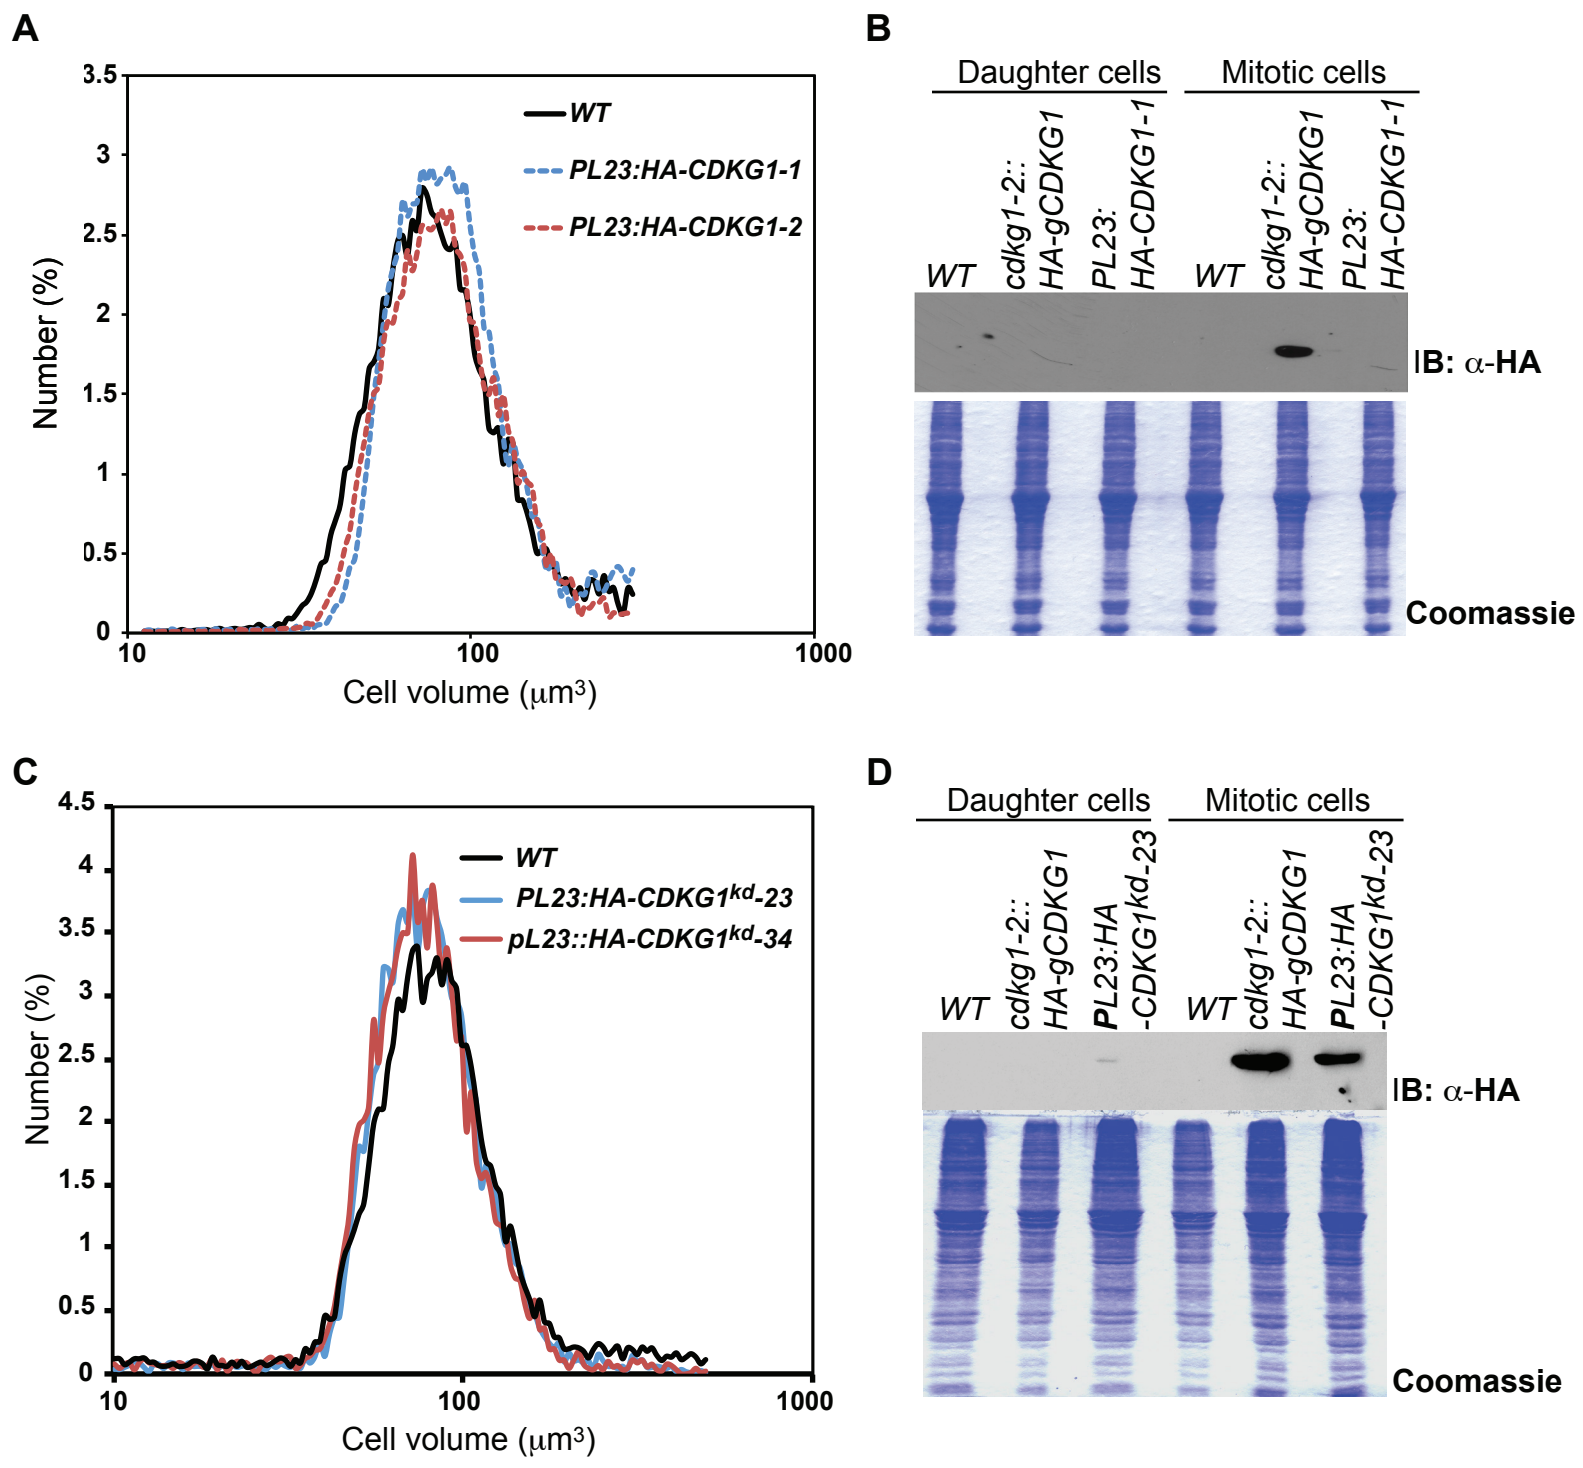

Supplement: supp [file elife-10767-supp-v1.zip › elife_poa_e10767_Figure_6_figure_supplement_2.pdf]

Figure 3-figure supplement 1

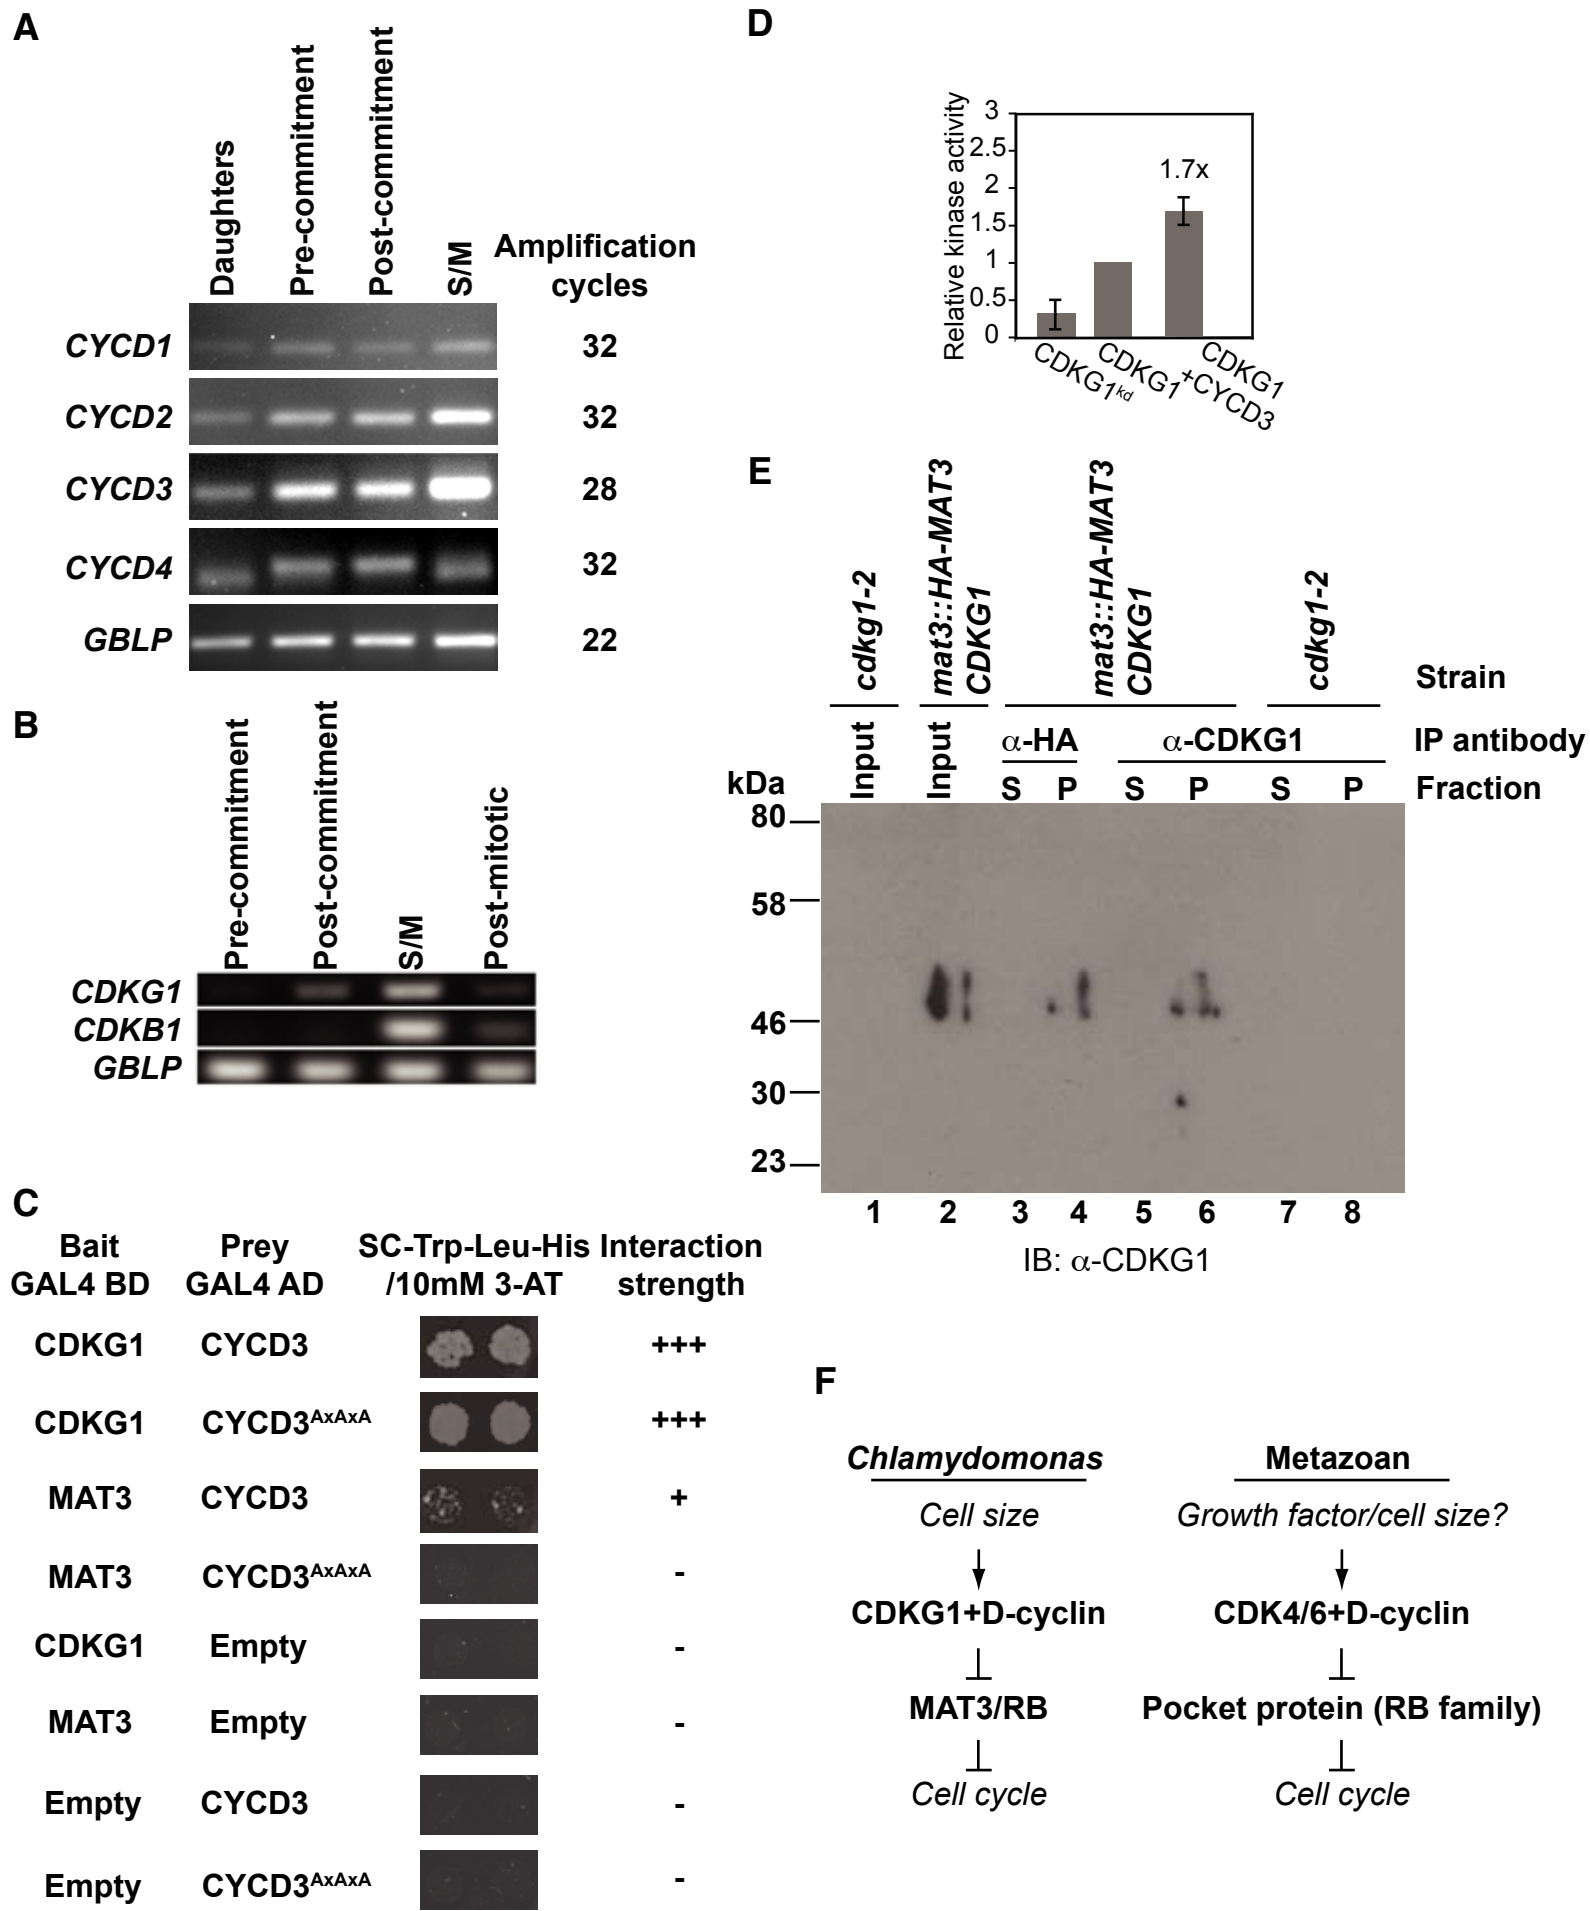

Supplement: supp [file elife-10767-supp-v1.zip › elife_poa_e10767_Figure_3_figure_supplement_1.pdf]

Figure 3-figure supplement 2

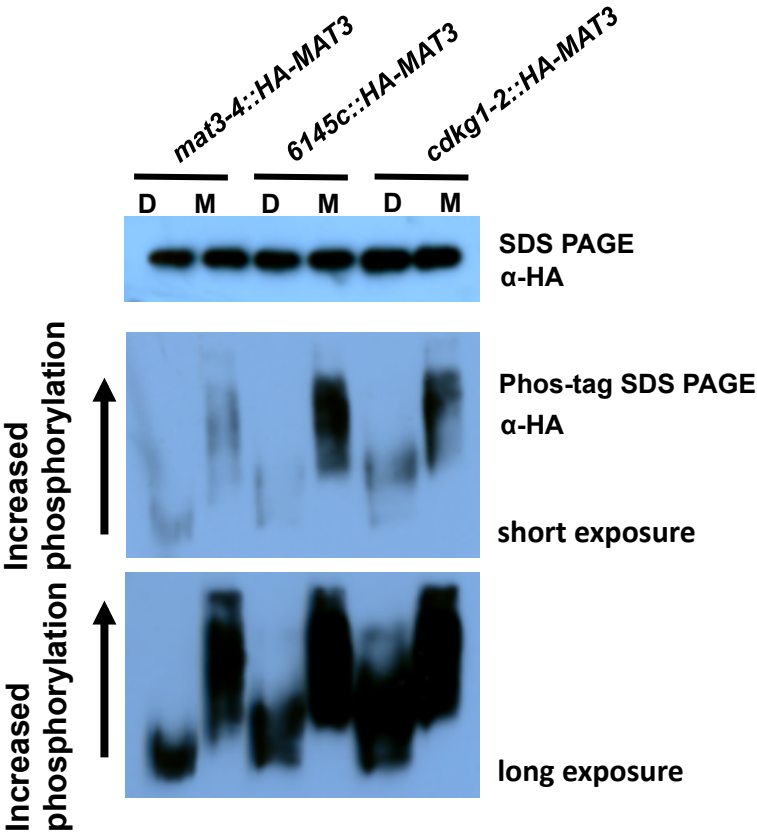

Supplement: supp [file elife-10767-supp-v1.zip › elife_poa_e10767_Figure_3_figure_supplement_2.pdf]

Figure 4-figure supplement 2

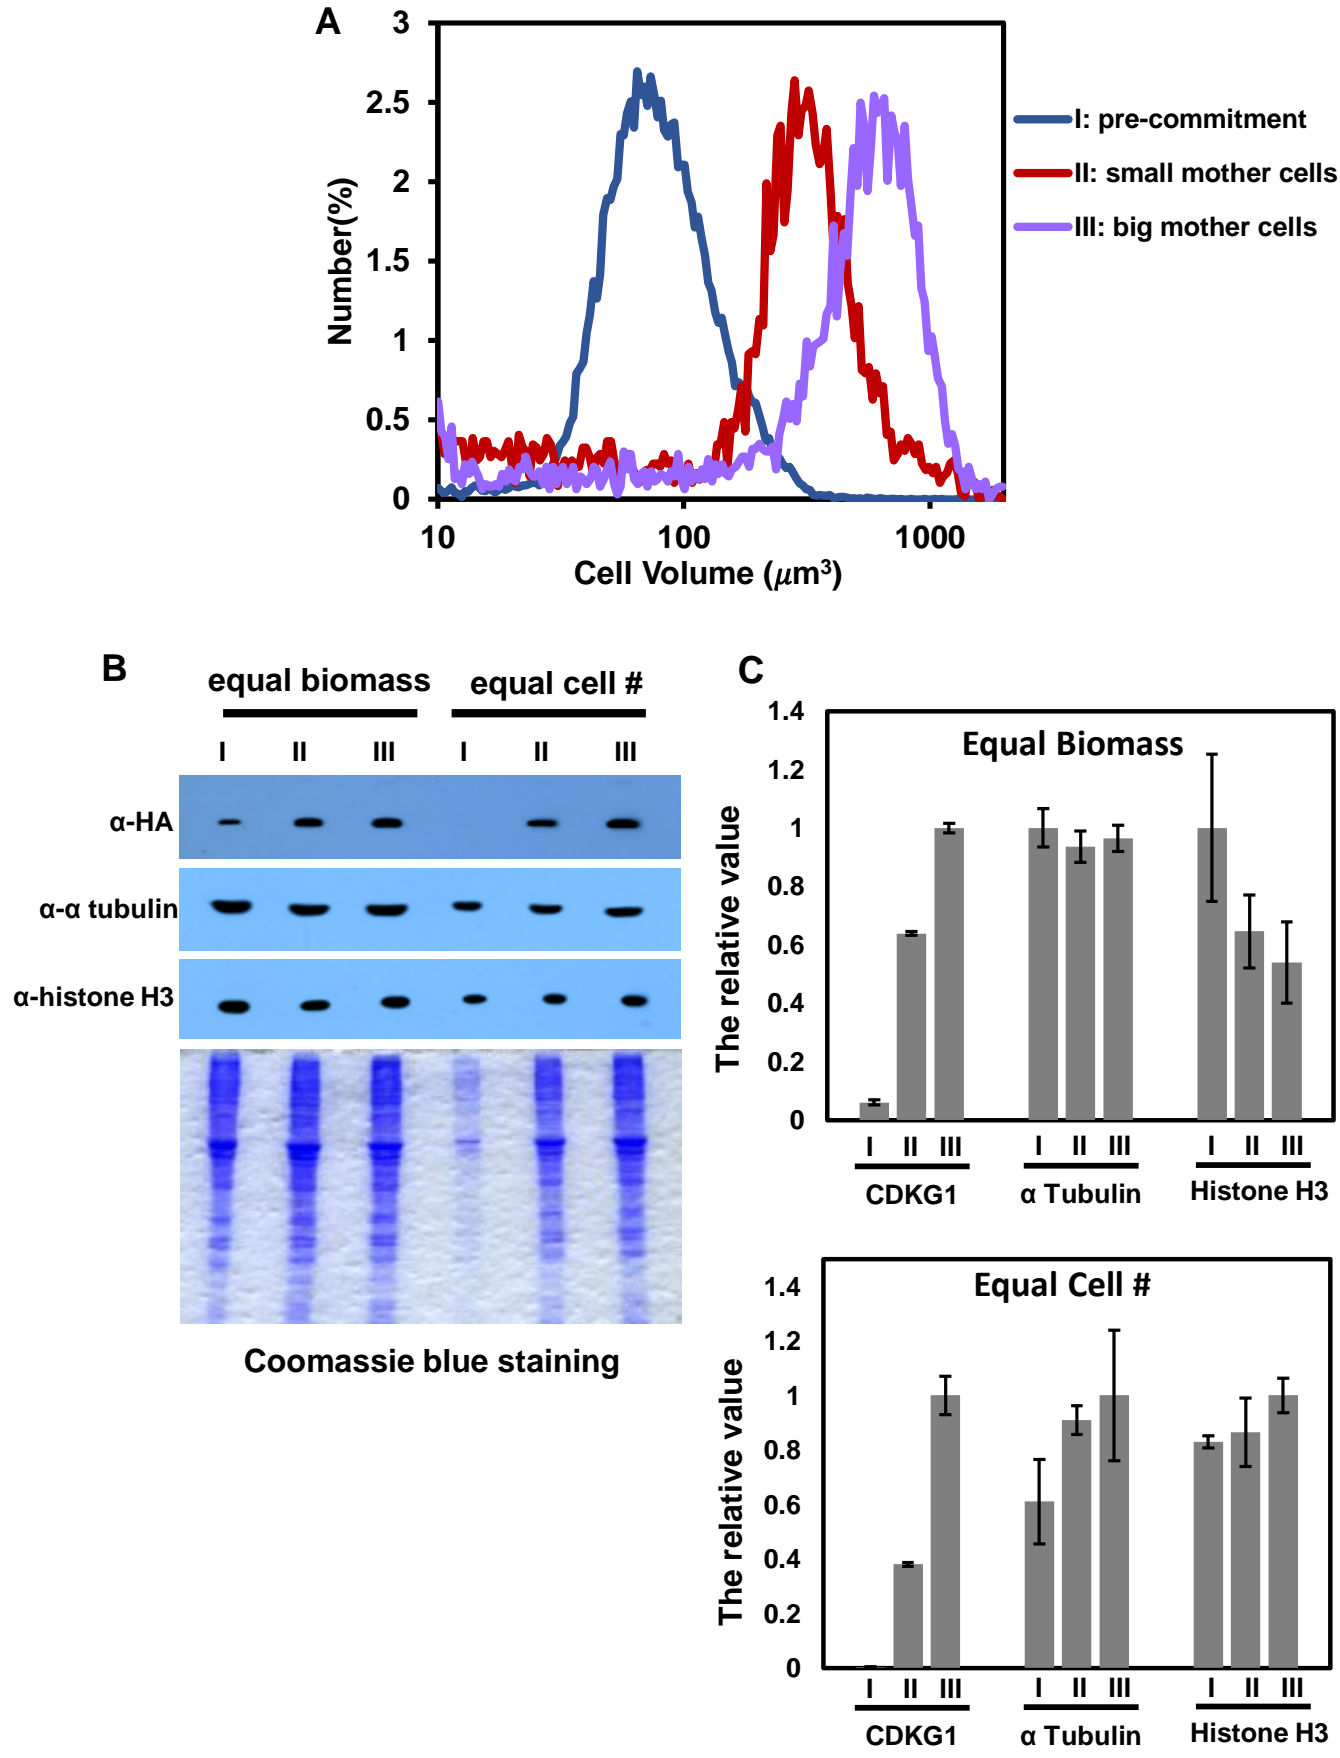

Supplement: supp [file elife-10767-supp-v1.zip › elife_poa_e10767_Figure_4_figure_supplement_2.pdf]

Figure 1-figure supplement 1

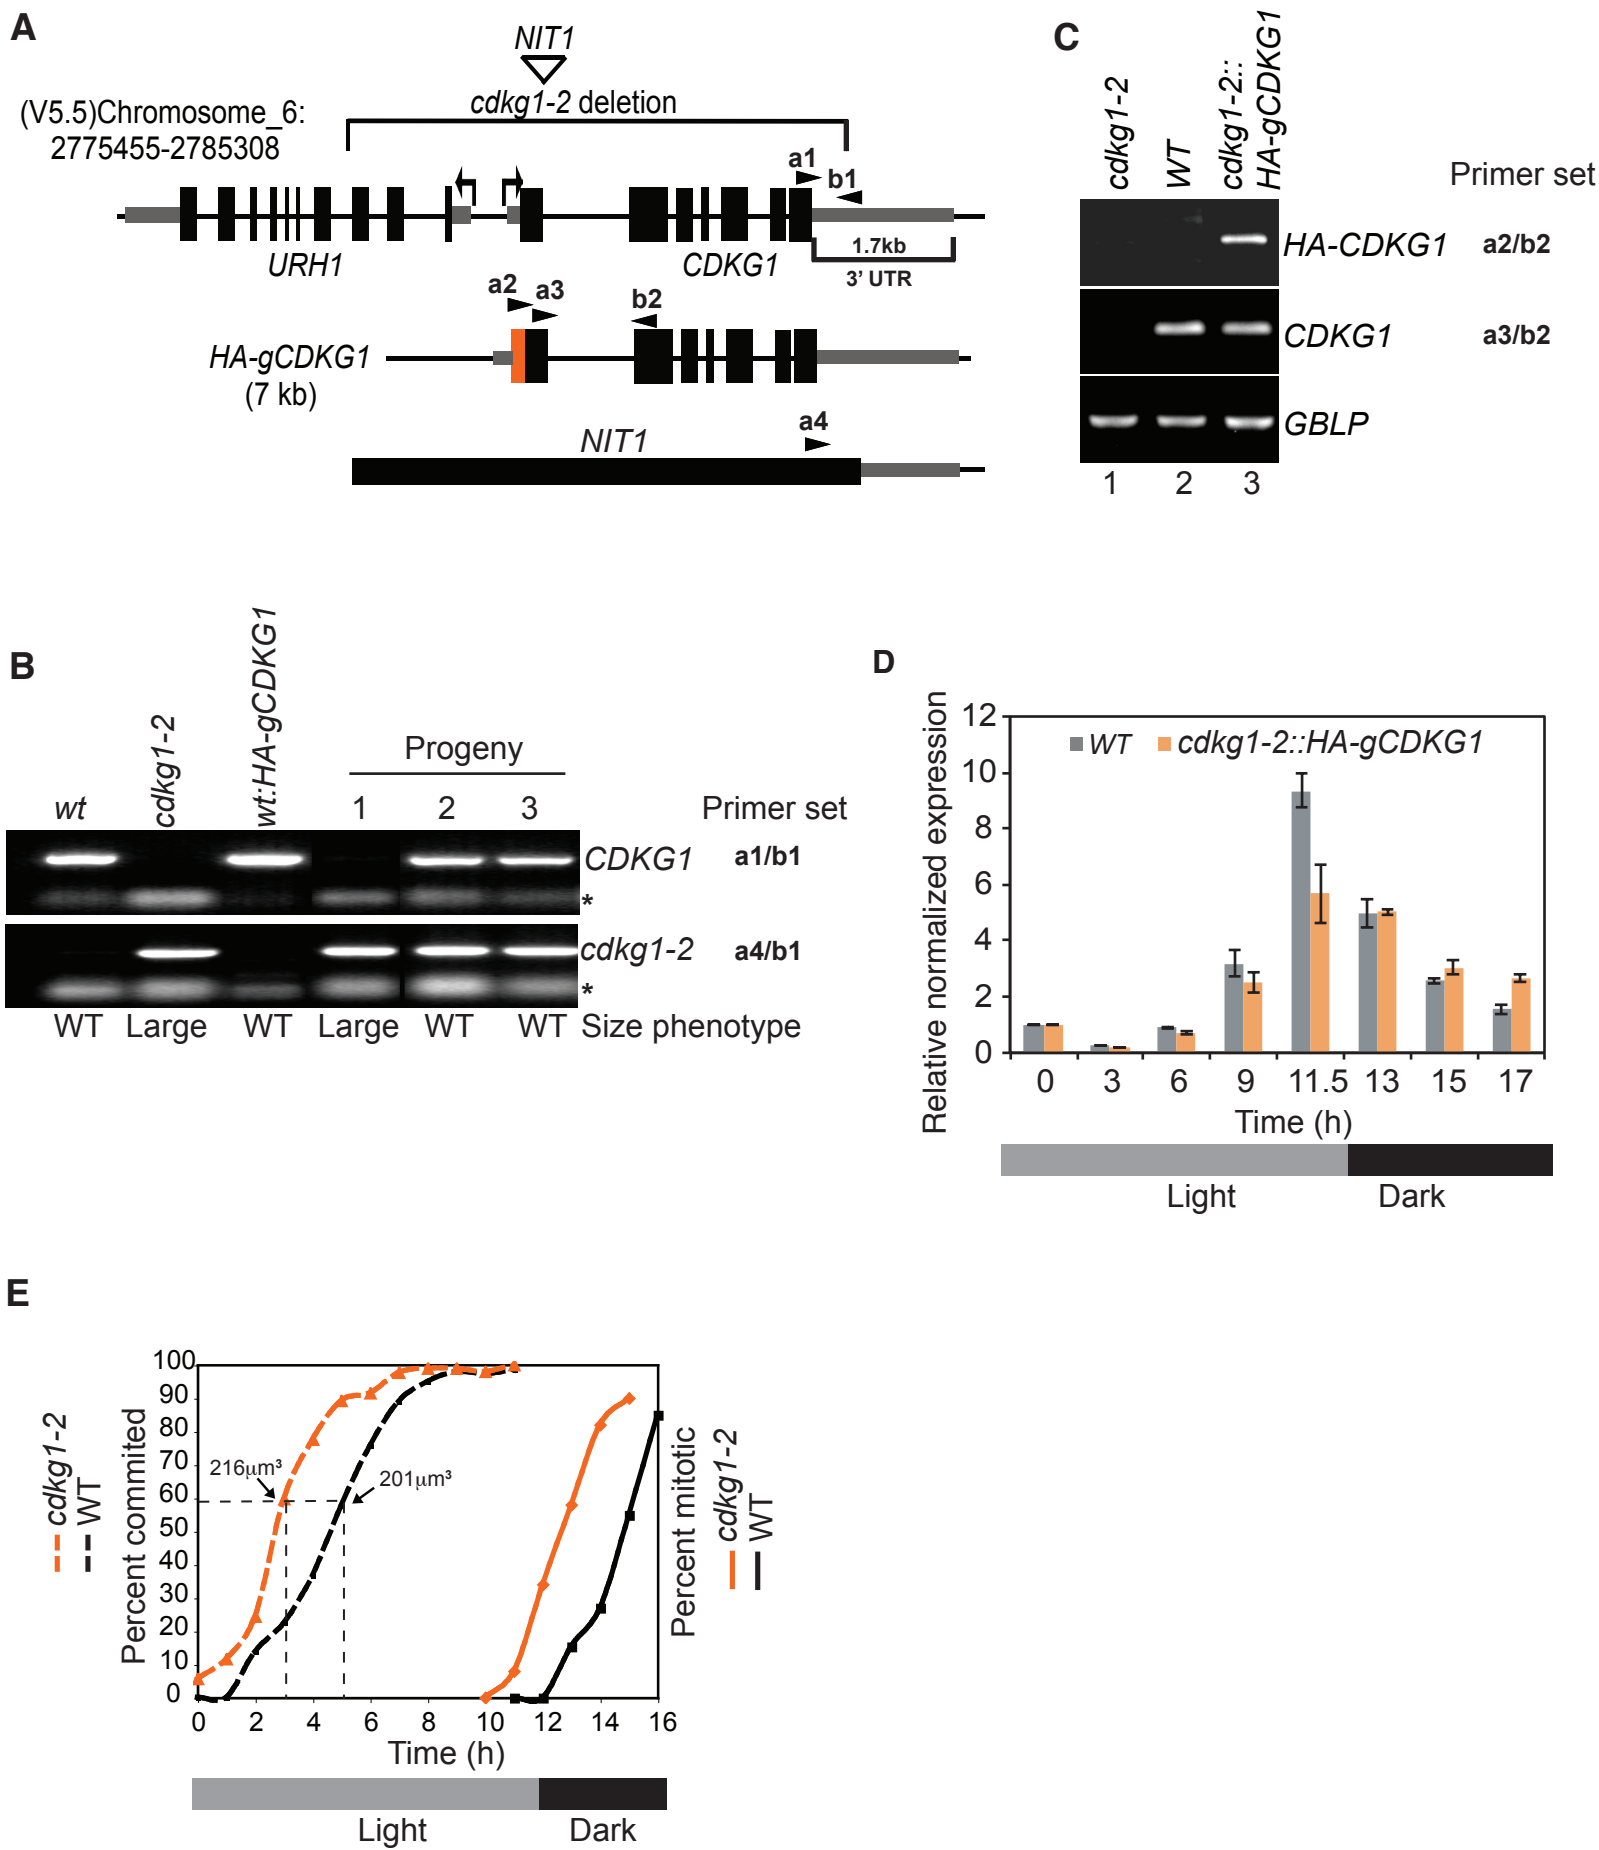

Supplement: supp [file elife-10767-supp-v1.zip › elife_poa_e10767_Figure_1_figure_supplement_1.pdf]

Figure 5-figure supplement 1

A

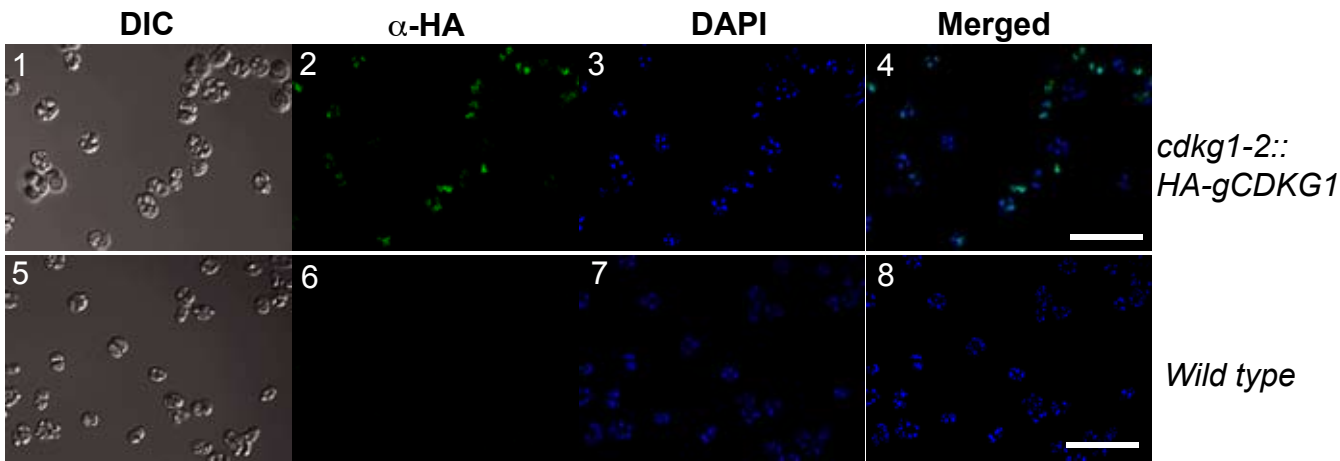

B

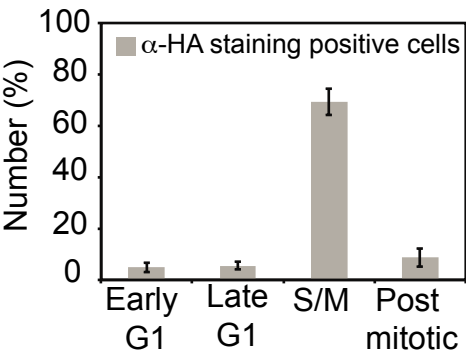

C

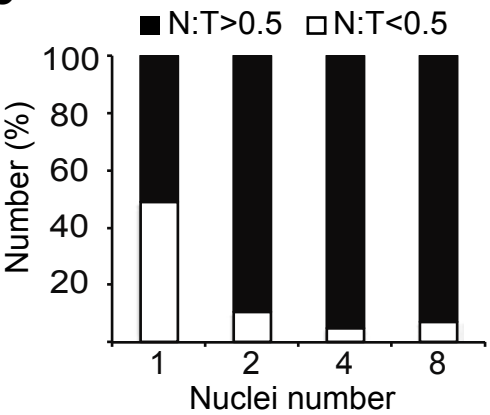

Supplement: supp [file elife-10767-supp-v1.zip › elife_poa_e10767_Figure_5_figure_supplement_1.pdf]
